# Supplementary material for: Logic-Device-Inspired Mechanical Computing System Based on Three- Dimensional Active Components
Source: Research Square preprint supplement (doi:10.21203/rs.3.rs-6200645/v1), 2025-04-18
Supplement: Supplementary file 1 [file bdd0ff5882bb2a44224b9b07.pdf]

## **Supplementary Information**

### **Logic-Device-Inspired Mechanical Computing System Based on Three-Dimensional Active Components**

Jun Hyun Park<sup>1,#</sup>, Jang Hwan Kim<sup>2,3,#</sup>, Ha Uk Chung<sup>4,#</sup>, Jun Seok Choe<sup>1</sup>, Hyokyeong Kim<sup>5</sup>,  
Su Eon Lee<sup>1</sup>, Simon Kim<sup>1</sup>, Ho Jun Jin<sup>1</sup>, Jiwoong Kim<sup>5,\*</sup>, Heon Lee<sup>6,\*</sup>, Jaehwan Kim<sup>7,\*</sup>, and  
Bong Hoon Kim<sup>1,\*</sup>

<sup>1</sup> Department of Robotics and Mechatronics Engineering, DGIST, Daegu, 42988, Republic of Korea.

<sup>2</sup> Department of Materials Science and Engineering, Ajou University, Suwon 16499, Republic of Korea.

<sup>3</sup> Department of Energy Systems Research, Ajou University, Suwon, 16499, Republic of Korea.

<sup>4</sup> School of Biomedical Engineering, Korea University, Seoul 02841, Republic of Korea.

<sup>5</sup> Department of Materials Science and Engineering, Soongsil University, Seoul 06978, Republic of Korea.

<sup>6</sup> Department of Materials Science and Engineering, Korea University, Seoul 02841, Republic of Korea.

<sup>7</sup> School of Mechanical System Engineering, Kumoh National Institute of Technology (KIT), Gumi 39177, Republic of Korea.

**This file includes:**

Supplementary Fig 1. to 6.

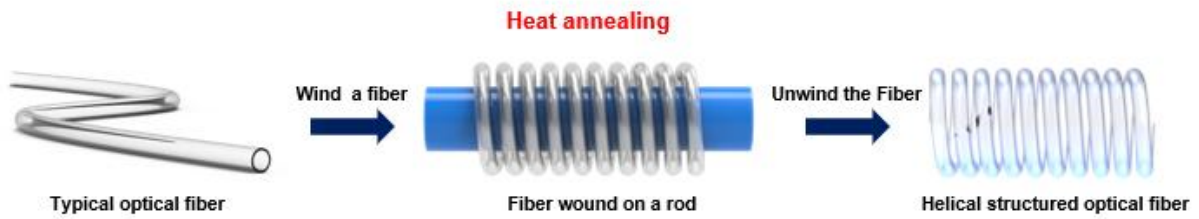

**Supplementary Fig 1.** Schematics illustration for the fabrication of the 3D helical structure optical fiber sensor.

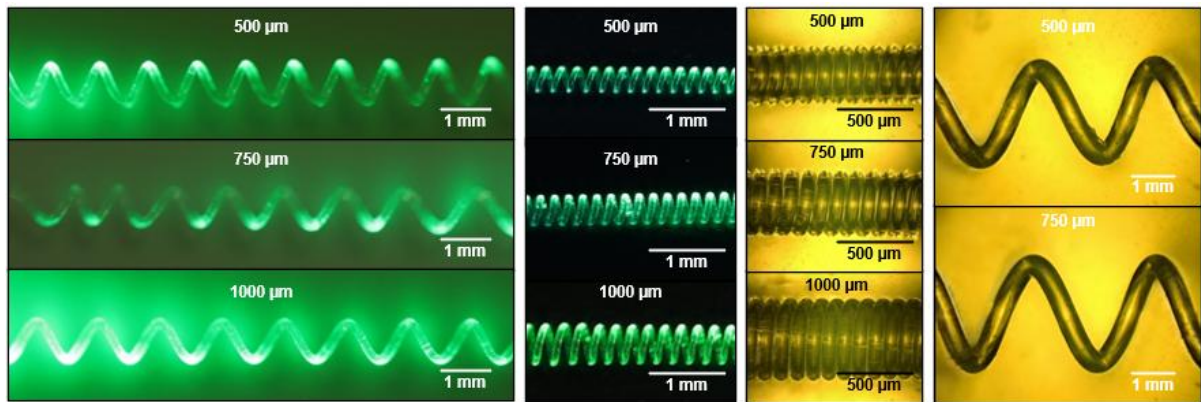

**Supplementary Fig 2.** Optical images and photographs of various 3D helical structure optical fibers with different diameters and core diameters.

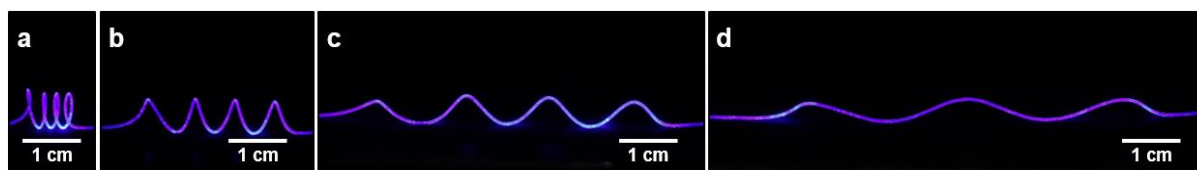

**Supplementary Fig 3.** An optical image of a 3D helical structure optical fiber sensor shows the corresponding results for the deformations and the distribution of helical fiber according to the various applied strains. **a** 0 %, **b** 300 %, **c** 600 %, **d** 900 %.

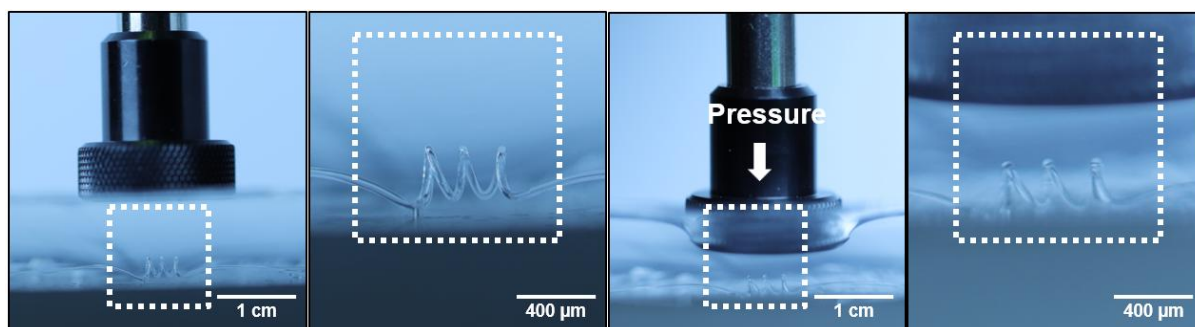

**Supplementary Fig 4.** Optical image of helical structure optical fiber as a pressure sensor. Before and After pressure photographs. Simulation image of helical structure optical fiber as a pressure sensor.

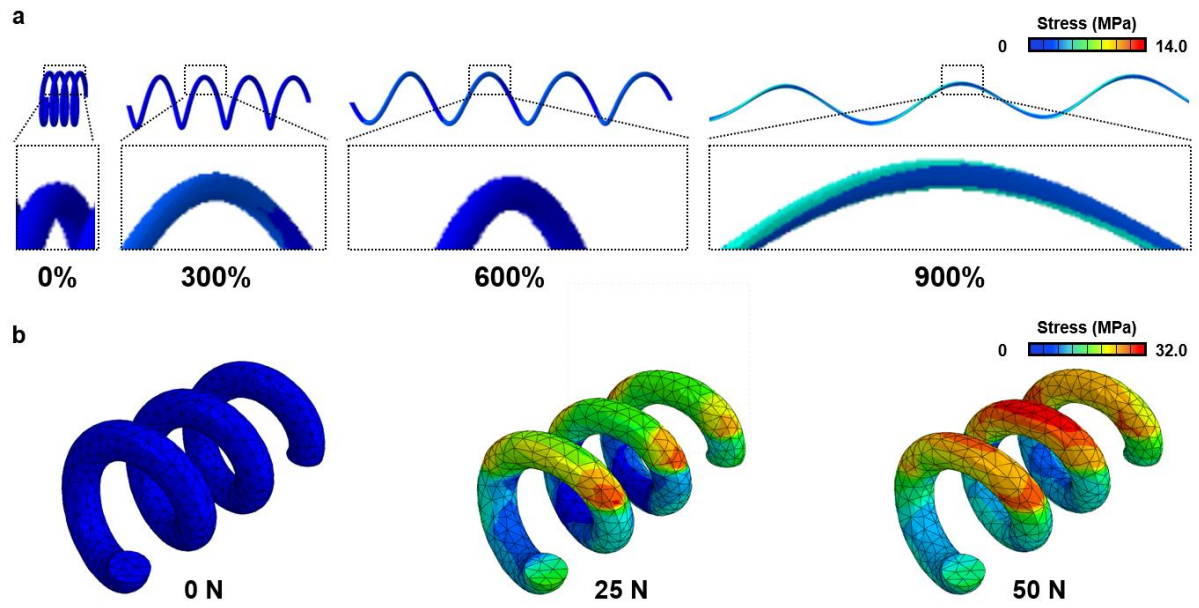

**Supplementary Fig 5.** Simulation data. **a** 0 %, 300 %, 600 %, 900 %. **b** 0 N, 25 N, 50 N

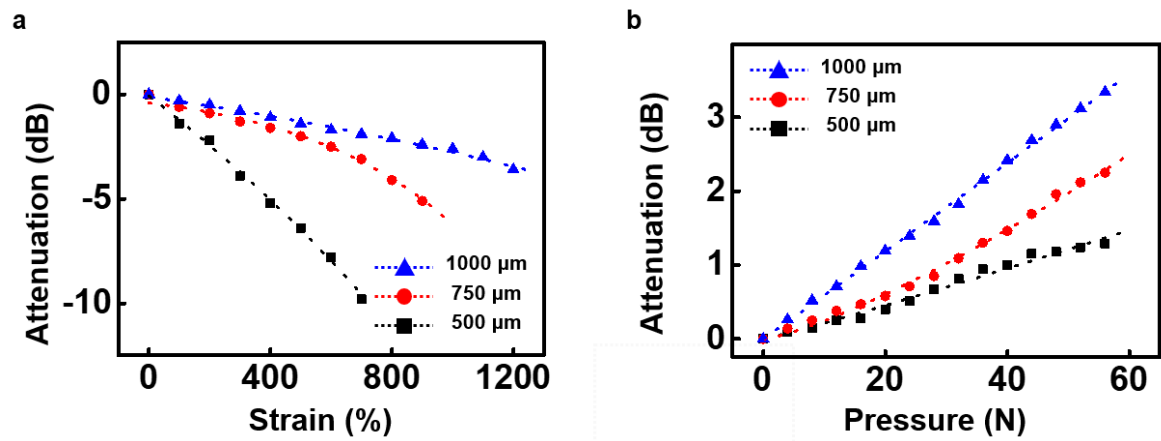

**Supplementary Fig 6.** **a** Response of attenuation changes of helical fibers with different optical fiber diameters as a function of strain. **b** Response of attenuation changes of helical fibers with different optical fiber's diameter as a function of pressure.
